# Supplementary material for: Integration of 2D material-based electronic devices on flexible substrates for millimeter wave applications
Source: Research Square preprint supplement (doi:10.21203/rs.3.rs-5397933/v1), 2024-12-03
Supplement: Supplementary file 1 [file a96bfff38caa5efa13d6452d.docx]

**Supporting Information**

**Integration of 2D material-based electronic devices on flexible substrates for millimeter wave applications**

*Eros Reato1,2, Paula Palacios3,4, Burkay Uzlu2, Eyyub Baskent3, Ardeshir Esteki1, Mohamed Saeed4,* *Francisco Pasadas5, Lukas Völkel1, Daniel S. Schneider1,2, Michael Heuken6,Daniel Neumaier,2,7, Zhenxing Wang1,*, Renato Negra3,* and Max C. Lemme1,2,**

1Chair of Electronic Devices, RWTH Aachen University, Otto-Blumenthal-Strasse 25, 52074 Aachen, Germany

2AMO GmbH, Otto-Blumenthal-Strasse 25, 52074 Aachen, Germany

3Chair of High-Frequency Electronics, RWTH-Aachen University, Kopernikusstraße 16, 52074 Aachen, Germany

4InCirtT GmbH, Kopernikusstraße 16, 52074 Aachen, Germany

5Dep. de Electrónica y Tecnología de Computadores, Campus de Fuentenueva, 18071, Granada, Spain

6AIXTRON SE, Dornkaulstrasse 2, 52134 Herzogenrath, Germany

7Bergische Universität Wuppertal, Lise-Meitner-Str. 13, 42119 Wuppertal, Germany

*: [wang@amo.de](mailto:wang@amo.de); [renato.Negra@hfe.rwth-aachen.de](mailto:renato.Negra@hfe.rwth-aachen.de); [max.lemme@eld.rwth-aachen.de](mailto:max.lemme@eld.rwth-aachen.de)

E. Reato and P. Palacios contributed equally to this work.

**Raman data**

We conducted material characterization via Raman spectroscopy on Si/SiO2 substrates**. Figure S1** shows the Raman spectra for graphene and MoS2 following a transfer process on a Si/SiO2 test substrate. The transfer process we used in this case was identical to that performed on the PI substrate, described in **Section II.B**. The Raman measurements revealed curves characteristic of both materials, confirming successful growth and transfer on the target substrates [1], [2].

**
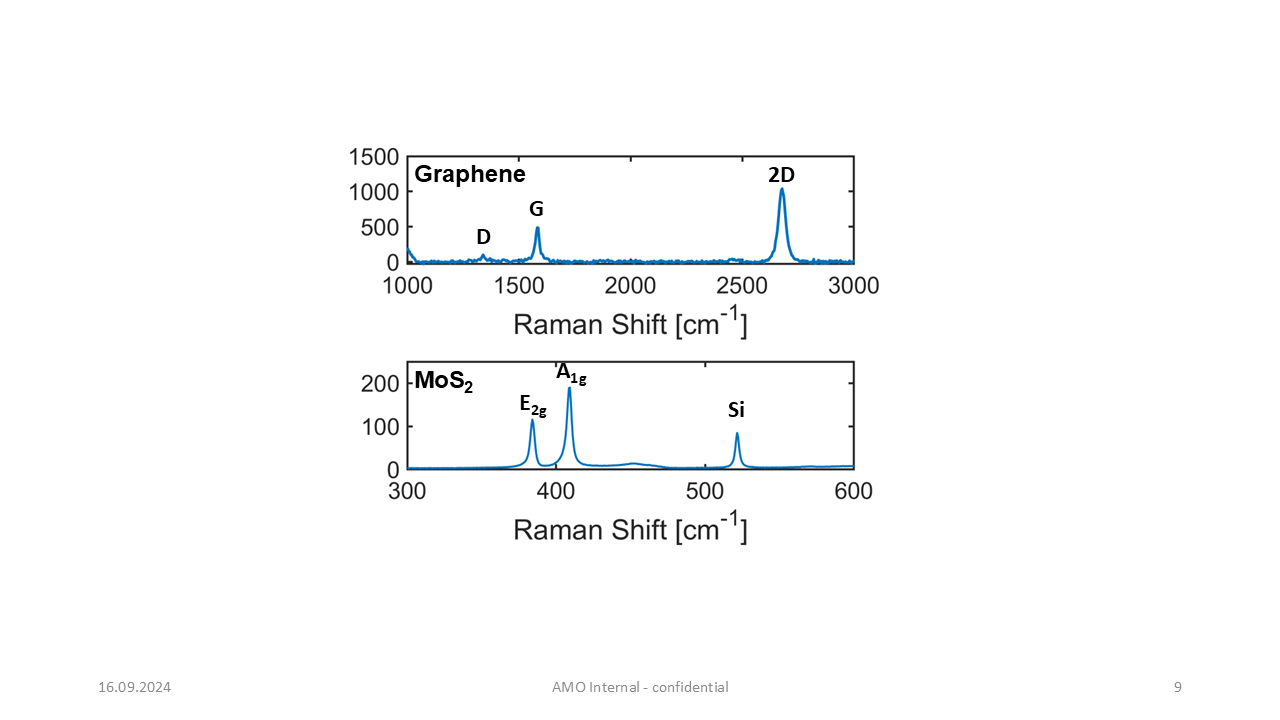
**

Figure S1: Raman spectra of graphene and MoS2.

**hBN/MoS2/hBN stack transfer**

hBN was purchased from the supplier as a 2 nm thick film on a copper foil growth substrate. We first spin-coated approximately 600 nm thick PMMA onto the hBN on the copper foil. Then, we etched the copper substrate in a solution of HCl, H2O2 and DI water, leaving a free-standing PMMA and hBN layer. We then transferred the hBN layer to OX2 via DI water for adhesion. Finally, we allowed the transferred materials to dry overnight in a laminar airflow and removed the PMMA layer with an acetone bath. We then spin-coated 600 nm PMMA onto the as-grown MoS2 on sapphire and delaminated the stack of PMMA and MoS2 by intercalating DI water. For the transfer of MoS2, only water was used to remove the material from the sapphire growth substrate to avoid further contamination by other chemicals commonly used for this purpose [3], [4], [5], [6]. As in the case of hBN, this resulted in a freestanding stack of PMMA and MoS2, which was then transferred onto the previously transferred h-BN using DI water. The resulting stack of materials was dried overnight in a laminar flow oven, and the carrier PMMA layer was stripped with acetone. Finally, the last hBN layer was transferred onto the hBN/MoS2 stack via the same procedure as that used for the bottom hBN layer. The process is illustrated in **Figure S 2.**


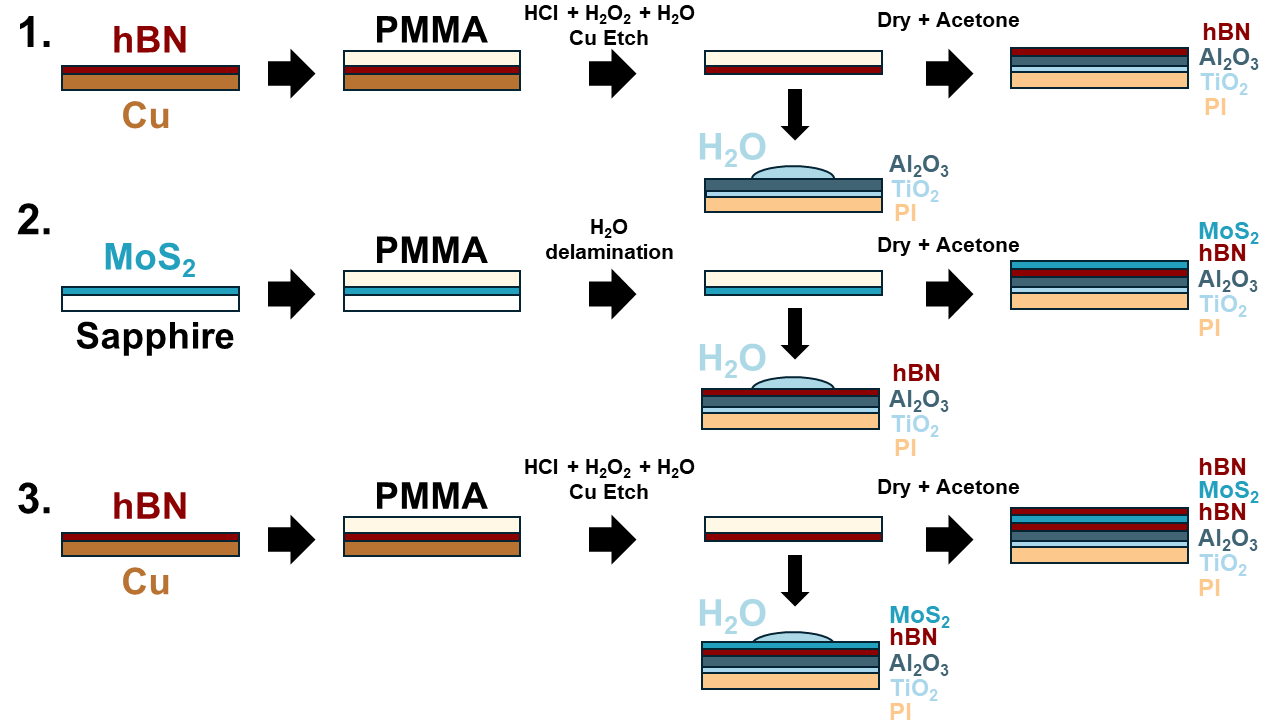


Figure S2. Process for fabricating hBN, MoS2 and hBN stacks on the target substrate.

**Bending Tests**

We peeled the sample from the carrier substrate after the fabrication ended. To peel the thin polyimide layer from the silicon carrier, we first made small scratches with a scalpel at the four corners of the sample, followed by complete peeling of the PI from the substrate. After this, we prepared a handmade supporting structure made of blue wafer tape that was attached to the edges of the sample and a plastic substrate foil that went underneath and provided support to the structure. This packaging solution makes it possible to handle the sample and to avoid excessive curling of the thin PI edges, which could introduce unwanted stress to the sample while keeping the top surface with the devices accessible to the measurement needles, as shown in **Figure 3** in the main text.

**References**

[1] L. M. Malard, M. A. Pimenta, G. Dresselhaus, and M. S. Dresselhaus, “Raman spectroscopy in graphene,” *Phys. Rep.*, vol. 473, no. 5, pp. 51–87, Apr. 2009, doi: 10.1016/j.physrep.2009.02.003.

[2] H. Li, Q. Zhang, C. C. R. Yap, B. K. Tay, T. H. T. Edwin, A. Olivier, and D. Baillargeat, “From Bulk to Monolayer MoS2: Evolution of Raman Scattering,” *Adv. Funct. Mater.*, vol. 22, no. 7, pp. 1385–1390, 2012, doi: 10.1002/adfm.201102111.

[3] H. Li, J. Wu, X. Huang, Z. Yin, J. Liu, and H. Zhang, “A Universal, Rapid Method for Clean Transfer of Nanostructures onto Various Substrates,” *ACS Nano*, vol. 8, no. 7, pp. 6563–6570, Jul. 2014, doi: 10.1021/nn501779y.

[4] Z. Lu, L. Sun, G. Xu, J. Zheng, Q. Zhang, J. Wang, and L. Jiao, “Universal Transfer and Stacking of Chemical Vapor Deposition Grown Two-Dimensional Atomic Layers with Water-Soluble Polymer Mediator,” *ACS Nano*, vol. 10, no. 5, pp. 5237–5242, May 2016, doi: 10.1021/acsnano.6b00961.

[5] H. Yu, M. Liao, W. Zhao, G. Liu, X. J. Zhou, Z. Wei, X. Xu, K. Liu, Z. Hu, K. Deng, S. Zhou, J.-A. Shi, L. Gu, C. Shen, T. Zhang, L. Du, L. Xie, J. Zhu, W. Chen, R. Yang, D. Shi, and G. Zhang, “Wafer-Scale Growth and Transfer of Highly-Oriented Monolayer MoS2 Continuous Films,” *ACS Nano*, vol. 11, no. 12, pp. 12001–12007, Dec. 2017, doi: 10.1021/acsnano.7b03819.

[6] M. Graf, M. Lihter, M. Thakur, V. Georgiou, J. Topolancik, B. R. Ilic, K. Liu, J. Feng, Y. Astier, and A. Radenovic, “Fabrication and practical applications of molybdenum disulfide nanopores,” *Nat. Protoc.*, vol. 14, no. 4, Art. no. 4, Apr. 2019, doi: 10.1038/s41596-019-0131-0.
